# Supplementary material for: Determination of ZFS parameters from the EPR spectra of mono-, di- and trinuclear MnIIcomplexes: impact of magnetic coupling
Source: Royal Society of Chemistry journal article supplement (doi:10.1039/c6dt04012h), 2017-01-01
Supplement: c6dt04012h1.pdf [file c6dt04012h1.pdf]

## ELECTRONIC SUPPLEMENTARY INFORMATION (ESI)

### Title:

Determination of ZFS parameters from the EPR spectra of mono-, di- and trinuclear Mn<sup>II</sup> complexes: impact of magnetic coupling

### Authors:

Luis Escriche-Tur, Mercè Font-Bardia, Belén Albela, Montserrat Corbella.

### Content:

|                                                                                                  |    |
|--------------------------------------------------------------------------------------------------|----|
| Table S1. Crystallographic data for <b>1</b> , <b>2</b> , and <b>3</b> .....                     | S2 |
| Table S2. Crystallographic data for <b>5</b> , <b>6</b> , and <b>7</b> .....                     | S2 |
| Table S3. Crystallographic data for <b>8</b> , <b>9</b> , and <b>12</b> .....                    | S3 |
| Figure S1. Crystal structures of <b>1</b> , <b>2</b> , <b>3</b> and <b>5</b> .....               | S3 |
| Figure S2. Crystal structures of <b>6</b> and <b>7</b> .....                                     | S4 |
| Table S4. Selected structural parameters for <b>1</b> , <b>2</b> , <b>3</b> , and <b>5</b> ..... | S4 |
| Table S5. Selected structural parameters for <b>6</b> and <b>7</b> .....                         | S4 |
| Table S6. Selected structural parameters for <b>8</b> and <b>9</b> .....                         | S5 |
| Figure S3. Complete crystal structure of <b>9</b> .....                                          | S5 |
| Table S7. Selected structural parameters for the entire structure of <b>9</b> .....              | S5 |
| Table S8. Selected structural parameters of <b>12</b> .....                                      | S6 |
| Figure S4. $\chi_M T$ versus $T$ and $\chi_M$ versus $T$ plots for <b>4</b> and <b>5</b> .....   | S6 |
| Figure S5. EPR spectra of <b>5</b> and <b>6</b> at different temperatures .....                  | S6 |
| Figure S6. Simulated EPR spectra for ferromagnetic dinuclear systems .....                       | S7 |
| Figure S7. Experimental and simulated EPR spectra of <b>7</b> at 4 and 77 K .....                | S7 |
| Figure S8. Experimental and simulated EPR spectra of <b>11</b> at 4 and 60 K .....               | S8 |
| Figure S9. Simulated EPR spectra for trinuclear systems .....                                    | S8 |
| Figure S10. Effect of $D_{Mn}$ on EPR spectra for trinuclear systems .....                       | S9 |

**Table S1.** Crystal data and structure refinement details for compounds **1**, **2**, and **3**.

|                                                                                                                 | <b>1</b>                                                                                       | <b>2</b>                                                                                       | <b>3</b>                                                                                       |
|-----------------------------------------------------------------------------------------------------------------|------------------------------------------------------------------------------------------------|------------------------------------------------------------------------------------------------|------------------------------------------------------------------------------------------------|
| Formula                                                                                                         | C <sub>56</sub> H <sub>46</sub> Cl <sub>2</sub> Mn <sub>2</sub> N <sub>8</sub> O <sub>14</sub> | C <sub>56</sub> H <sub>46</sub> Cl <sub>2</sub> Mn <sub>2</sub> N <sub>8</sub> O <sub>14</sub> | C <sub>56</sub> H <sub>46</sub> Cl <sub>2</sub> Mn <sub>2</sub> N <sub>8</sub> O <sub>14</sub> |
| Fw (g/mol)                                                                                                      | 1235.79                                                                                        | 1235.79                                                                                        | 1235.79                                                                                        |
| Crystal colour, habit                                                                                           | Yellow, prism                                                                                  | Yellow, prism                                                                                  | Yellow, prism                                                                                  |
| T (K)                                                                                                           | 293(2)                                                                                         | 90(2)                                                                                          | 293(2)                                                                                         |
| $\lambda$ (Mo-K $\alpha$ ) / Å                                                                                  | 0.71073                                                                                        | 0.71073                                                                                        | 0.71073                                                                                        |
| Crystal size (mm)                                                                                               | 0.2 x 0.1 x 0.1                                                                                | 0.19 x 0.12 x 0.10                                                                             | 0.2 x 0.1 x 0.1                                                                                |
| Crystal system                                                                                                  | Triclinic                                                                                      | Monoclinic                                                                                     | Triclinic                                                                                      |
| Space group                                                                                                     | <i>P</i> -1                                                                                    | <i>P</i> 2 <sub>1</sub> / <i>c</i>                                                             | <i>P</i> -1                                                                                    |
| <i>a</i> / Å                                                                                                    | 8.494(4)                                                                                       | 9.1362(4)                                                                                      | 9.1240(6)                                                                                      |
| <i>b</i> / Å                                                                                                    | 13.051(5)                                                                                      | 23.6792(10)                                                                                    | 12.579(6)                                                                                      |
| <i>c</i> / Å                                                                                                    | 14.288(5)                                                                                      | 12.2498(5) A                                                                                   | 13.411(6)                                                                                      |
| $\alpha$ / °                                                                                                    | 113.12(2)                                                                                      | 90                                                                                             | 63.45(2)                                                                                       |
| $\beta$ / °                                                                                                     | 105.19(3)                                                                                      | 92.8570(10)                                                                                    | 88.31(4)                                                                                       |
| $\gamma$ / °                                                                                                    | 92.03(3)                                                                                       | 90                                                                                             | 84.21(4)                                                                                       |
| <i>V</i> / Å <sup>3</sup>                                                                                       | 1388.6(10)                                                                                     | 2646.80(19)                                                                                    | 1369.6(9)                                                                                      |
| <i>Z</i>                                                                                                        | 1                                                                                              | 2                                                                                              | 1                                                                                              |
| $\rho_{\text{calcd}}$ / g·cm <sup>-3</sup>                                                                      | 1.478                                                                                          | 1.551                                                                                          | 1.498                                                                                          |
| $\mu$ / mm <sup>-1</sup>                                                                                        | 0.625                                                                                          | 0.656                                                                                          | 0.634                                                                                          |
| <i>F</i> (000)                                                                                                  | 634                                                                                            | 1268                                                                                           | 634                                                                                            |
| $\theta$ range / °                                                                                              | 1.625 to 29.966                                                                                | 2.232 to 41.336                                                                                | 1.698 to 32.436                                                                                |
| Completeness (to $\theta$ / °)                                                                                  | 92.6% (25.242)                                                                                 | 99.9% (41.336)                                                                                 | 93.6% (25.242)                                                                                 |
| Index ranges                                                                                                    | <i>h</i> = -9 → 10<br><i>k</i> = -17 → 16<br><i>l</i> = -19 → 19                               | <i>h</i> = -16 → 16<br><i>k</i> = -43 → 43<br><i>l</i> = -22 → 22                              | <i>h</i> = -12 → 11<br><i>k</i> = -18 → 18<br><i>l</i> = -18 → 20                              |
| Data/restraints/param.                                                                                          | 6090 / 15 / 407                                                                                | 17755 / 0 / 370                                                                                | 7910 / 3 / 361                                                                                 |
| Goof on <i>F</i> <sup>2</sup>                                                                                   | 1.059                                                                                          | 1.085                                                                                          | 1.088                                                                                          |
| <i>R</i> <sub>1</sub> <sup>a</sup> , $\omega R$ <sub>2</sub> <sup>b</sup> [ <i>I</i> > 2 $\sigma$ ( <i>I</i> )] | 0.0344, 0.0971                                                                                 | 0.0356, 0.0898                                                                                 | 0.0739, 0.1971                                                                                 |
| <i>R</i> <sub>1</sub> <sup>a</sup> , $\omega R$ <sub>2</sub> <sup>b</sup> (all data)                            | 0.0384, 0.1003                                                                                 | 0.0471, 0.0952                                                                                 | 0.1109, 0.2216                                                                                 |

$$^a R_1 = \sum |F_o| - |F_c| / \sum |F_o|. \quad ^b \omega R_2 = \{\sum [\omega(F_o^2 - F_c^2)^2] / \sum [\omega(F_o^2)^2]\}^{1/2}, \quad \omega = 1 / [\sigma^2(F_o^2) + (aP)^2 + bP], \quad \text{where } P = [\max(F_o^2, 0) + 2F_c^2] / 3.$$

**Table S2.** Crystal data and structure refinement details for compounds **5**, **6**, and **7**.

|                                                                                                                 | <b>5</b>                                                                                       | <b>6</b>                                                                                       | <b>7</b>                                                                                       |
|-----------------------------------------------------------------------------------------------------------------|------------------------------------------------------------------------------------------------|------------------------------------------------------------------------------------------------|------------------------------------------------------------------------------------------------|
| Formula                                                                                                         | C <sub>70</sub> H <sub>58</sub> Cl <sub>2</sub> Mn <sub>2</sub> N <sub>8</sub> O <sub>12</sub> | C <sub>64</sub> H <sub>46</sub> Cl <sub>2</sub> Mn <sub>2</sub> N <sub>8</sub> O <sub>14</sub> | C <sub>64</sub> H <sub>46</sub> Cl <sub>2</sub> Mn <sub>2</sub> N <sub>8</sub> O <sub>14</sub> |
| Fw (g/mol)                                                                                                      | 1384.02                                                                                        | 1331.87                                                                                        | 1331.87                                                                                        |
| Crystal colour, habit                                                                                           | Yellow, prism                                                                                  | Yellow, prism                                                                                  | Yellow, plaque                                                                                 |
| T (K)                                                                                                           | 302(2)                                                                                         | 100(2)                                                                                         | 100(2)                                                                                         |
| $\lambda$ (Mo-K $\alpha$ ) / Å                                                                                  | 0.71073                                                                                        | 0.71073                                                                                        | 0.71073                                                                                        |
| Crystal size (mm)                                                                                               | 0.21 x 0.18 x 0.17                                                                             | 0.32 x 0.30 x 0.26                                                                             | 0.28 x 0.13 x 0.05                                                                             |
| Crystal system                                                                                                  | Triclinic                                                                                      | Triclinic                                                                                      | Monoclinic                                                                                     |
| Space group                                                                                                     | <i>P</i> -1                                                                                    | <i>P</i> -1                                                                                    | <i>C</i> 2/ <i>m</i>                                                                           |
| <i>a</i> / Å                                                                                                    | 10.516(4)                                                                                      | 9.5795(16)                                                                                     | 9.1362(4)                                                                                      |
| <i>b</i> / Å                                                                                                    | 12.247(4)                                                                                      | 12.309(2)                                                                                      | 23.6792(10)                                                                                    |
| <i>c</i> / Å                                                                                                    | 13.821(5)                                                                                      | 13.644(3)                                                                                      | 12.2498(5)                                                                                     |
| $\alpha$ / °                                                                                                    | 67.567(13)                                                                                     | 64.358(7)                                                                                      | 90                                                                                             |
| $\beta$ / °                                                                                                     | 84.331(17)                                                                                     | 84.369(7)                                                                                      | 92.8570(10)                                                                                    |
| $\gamma$ / °                                                                                                    | 78.406(16)                                                                                     | 84.183(7)                                                                                      | 90                                                                                             |
| <i>V</i> / Å <sup>3</sup>                                                                                       | 1611.3(10)                                                                                     | 1440.3(5)                                                                                      | 2646.80(19)                                                                                    |
| <i>Z</i>                                                                                                        | 1                                                                                              | 1                                                                                              | 2                                                                                              |
| $\rho_{\text{calcd}}$ / g·cm <sup>-3</sup>                                                                      | 1.426                                                                                          | 1.536                                                                                          | 1.592                                                                                          |
| $\mu$ / mm <sup>-1</sup>                                                                                        | 0.545                                                                                          | 0.609                                                                                          | 0.632                                                                                          |
| <i>F</i> (000)                                                                                                  | 714                                                                                            | 682                                                                                            | 1364                                                                                           |
| $\theta$ range / °                                                                                              | 2.489 to 28.775                                                                                | 2.141 to 32.213                                                                                | 2.650 to 30.583                                                                                |
| Completeness (to $\theta$ / °)                                                                                  | 94.0% (25.242)                                                                                 | 99.6% (32.213)                                                                                 | 99.7% (30.583)                                                                                 |
| Index ranges                                                                                                    | <i>h</i> = -13 → 13<br><i>k</i> = -15 → 15<br><i>l</i> = -17 → 17                              | <i>h</i> = -14 → 14<br><i>k</i> = -18 → 18<br><i>l</i> = -20 → 20                              | <i>h</i> = -20 → 21<br><i>k</i> = -28 → 28<br><i>l</i> = -13 → 11                              |
| Data/restraints/param.                                                                                          | 6619 / 4 / 427                                                                                 | 10146 / 0 / 424                                                                                | 4379 / 8 / 239                                                                                 |
| Goof on <i>F</i> <sup>2</sup>                                                                                   | 1.020                                                                                          | 1.061                                                                                          | 1.173                                                                                          |
| <i>R</i> <sub>1</sub> <sup>a</sup> , $\omega R$ <sub>2</sub> <sup>b</sup> [ <i>I</i> > 2 $\sigma$ ( <i>I</i> )] | 0.0659, 0.1290                                                                                 | 0.0476, 0.1143                                                                                 | 0.0736, 0.1680                                                                                 |
| <i>R</i> <sub>1</sub> <sup>a</sup> , $\omega R$ <sub>2</sub> <sup>b</sup> (all data)                            | 0.2201, 0.2160                                                                                 | 0.0644, 0.1221                                                                                 | 0.0801, 0.1714                                                                                 |

$$^a R_1 = \sum |F_o| - |F_c| / \sum |F_o|. \quad ^b \omega R_2 = \{\sum [\omega(F_o^2 - F_c^2)^2] / \sum [\omega(F_o^2)^2]\}^{1/2}, \quad \omega = 1 / [\sigma^2(F_o^2) + (aP)^2 + bP], \quad \text{where } P = [\max(F_o^2, 0) + 2F_c^2] / 3.$$

**Table S3.** Crystal data and structure refinement details for compounds **8**, **9**, and **12**.

|                                                                                                                        | <b>8</b>                                                          | <b>9</b>                                                          | <b>12</b>                                                                      |
|------------------------------------------------------------------------------------------------------------------------|-------------------------------------------------------------------|-------------------------------------------------------------------|--------------------------------------------------------------------------------|
| Formula                                                                                                                | C <sub>32</sub> H <sub>25</sub> ClMnN <sub>4</sub> O <sub>8</sub> | C <sub>28</sub> H <sub>26</sub> MnN <sub>2</sub> O <sub>8</sub>   | C <sub>72</sub> H <sub>64</sub> Mn <sub>3</sub> N <sub>6</sub> O <sub>18</sub> |
| Fw (g/mol)                                                                                                             | 683.95                                                            | 573.45                                                            | 1466.11                                                                        |
| Crystal colour, habit                                                                                                  | Yellow, prism                                                     | Yellow, prism                                                     | Yellow, prism                                                                  |
| T (K)                                                                                                                  | 100(2)                                                            | 293(2)                                                            | 293 (2)                                                                        |
| $\lambda$ (Mo-K $\alpha$ ) / Å                                                                                         | 0.71073                                                           | 0.71073                                                           | 0.71073                                                                        |
| Crystal size (mm)                                                                                                      | 0.12 x 0.11 x 0.09                                                | 0.58 x 0.22 x 0.15                                                | 0.1 x 0.09 x 0.07                                                              |
| Crystal system                                                                                                         | Triclinic                                                         | Monoclinic                                                        | Triclinic                                                                      |
| Space group                                                                                                            | <i>P</i> -1                                                       | <i>Cc</i>                                                         | <i>P</i> -1                                                                    |
| <i>a</i> / Å                                                                                                           | 8.2965(7)                                                         | 25.088(3)                                                         | 11.201(10)                                                                     |
| <i>b</i> / Å                                                                                                           | 13.4504(10)                                                       | 20.956(3)                                                         | 11.519(7)                                                                      |
| <i>c</i> / Å                                                                                                           | 14.3581(12)                                                       | 20.011(3)                                                         | 14.455(10)                                                                     |
| $\alpha$ / °                                                                                                           | 102.403(3)                                                        | 90                                                                | 71.58(4)                                                                       |
| $\beta$ / °                                                                                                            | 91.449(4)                                                         | 102.342(5)                                                        | 71.09(4)                                                                       |
| $\gamma$ / °                                                                                                           | 106.589(3)                                                        | 90                                                                | 74.74(5)                                                                       |
| <i>V</i> / Å <sup>3</sup>                                                                                              | 1493.3(2)                                                         | 10278(2)                                                          | 1647(2)                                                                        |
| <i>Z</i>                                                                                                               | 2                                                                 | 16                                                                | 1                                                                              |
| $\rho_{\text{calcd}}$ / g·cm <sup>-3</sup>                                                                             | 1.521                                                             | 1.482                                                             | 1.478                                                                          |
| $\mu$ / mm <sup>-1</sup>                                                                                               | 0.592                                                             | 0.569                                                             | 0.645                                                                          |
| <i>F</i> (000)                                                                                                         | 702                                                               | 4752                                                              | 757                                                                            |
| $\theta$ range / °                                                                                                     | 2.422 to 27.975                                                   | 2.288 to 28.341                                                   | 1.539 to 32.411                                                                |
| Completeness (to $\theta$ / °)                                                                                         | 95.2% (25.242)                                                    | 99.6% (28.341)                                                    | 93.3% (25.000)                                                                 |
| Index ranges                                                                                                           | <i>h</i> = -10 → 10<br><i>k</i> = -17 → 17<br><i>l</i> = -18 → 18 | <i>h</i> = -32 → 33<br><i>k</i> = -27 → 27<br><i>l</i> = -26 → 26 | <i>h</i> = -15 → 16<br><i>k</i> = -17 → 17<br><i>l</i> = -21 → 21              |
| Data/restraints/param.                                                                                                 | 6591 / 136 / 451                                                  | 24219 / 4 / 1406                                                  | 9765 / 0 / 448                                                                 |
| Goof on <i>F</i> <sup>2</sup>                                                                                          | 1.141                                                             | 1.070                                                             | 1.050                                                                          |
| <i>R</i> <sub>1</sub> <sup>a</sup> , $\omega$ <i>R</i> <sub>2</sub> <sup>b</sup> [ <i>I</i> > 2 $\sigma$ ( <i>I</i> )] | 0.0607, 0.1143                                                    | 0.0407, 0.0871                                                    | 0.0859, 0.1881                                                                 |
| <i>R</i> <sub>1</sub> <sup>a</sup> , $\omega$ <i>R</i> <sub>2</sub> <sup>b</sup> (all data)                            | 0.0821, 0.1238                                                    | 0.0528, 0.0944                                                    | 0.1628, 0.2190                                                                 |

$$^a R_1 = \frac{\sum |F_o| - |F_c|}{\sum |F_o|}, \quad ^b \omega R_2 = \frac{\{\sum [\omega(F_o^2 - F_c^2)^2] / \sum [\omega(F_o^2)]\}^{1/2}, \quad \omega = 1 / [\sigma^2(F_o^2) + (aP)^2 + bP], \quad \text{where } P = [\max(F_o^2, 0) + 2F_c^2] / 3.$$

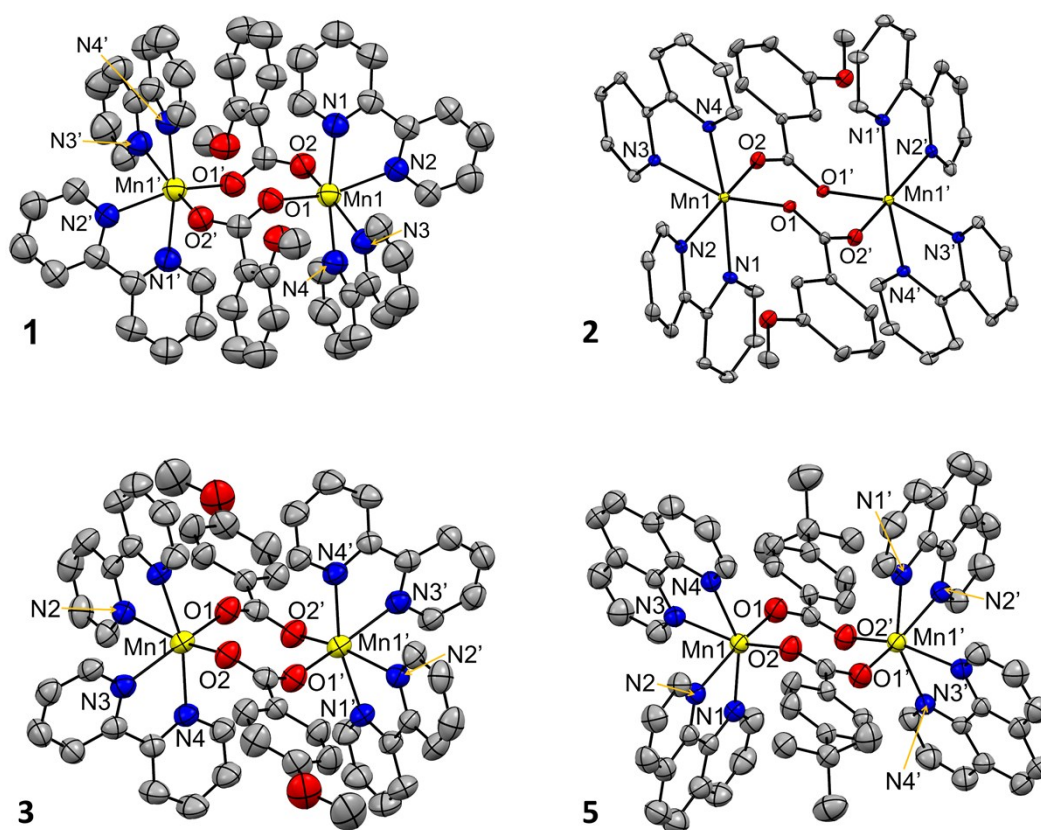**Figure S1.** Crystal structures of the cationic complexes of compounds **1**, **2**, **3**, and **5**, showing the anisotropic displacements as ellipsoids at 50% probability. Hydrogen atoms are omitted for clarity.

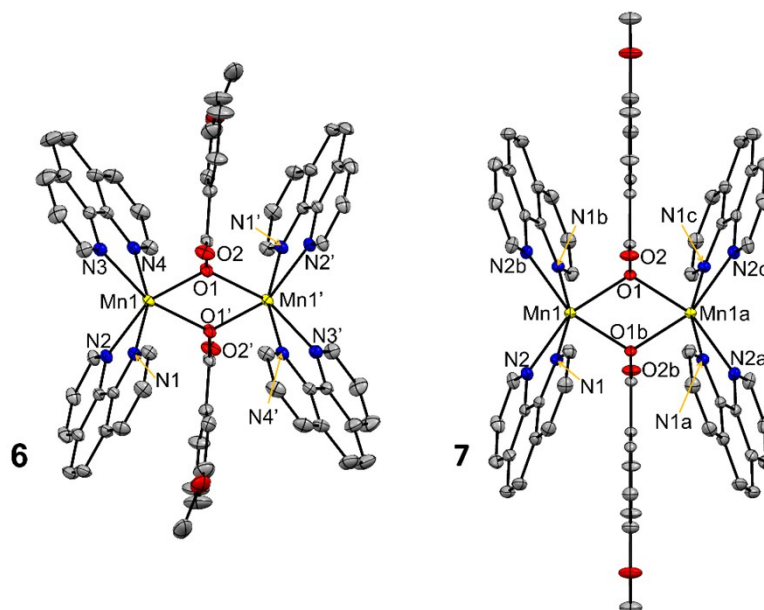

**Figure S2.** Crystal structures of the cationic complexes of compounds **6** and **7**, showing the anisotropic displacements as ellipsoids at 50% probability. Hydrogen atoms are omitted for clarity.

**Table S4.** Selected interatomic distances (Å) and angles (deg) with standard deviations in parentheses for compounds **1**, **2**, **3**, and **5**.

|            | <b>1 (2-MeO, bpy)</b> |  | <b>2 (3-MeO, bpy)</b> |            |
|------------|-----------------------|--|-----------------------|------------|
| Mn1...Mn1' | 4.751(2)              |  | Mn1...Mn1'            | 4.6396(7)  |
| Mn1-O1     | 2.1072(17)            |  | Mn1-O1                | 2.1341(6)  |
| Mn1-O2     | 2.1242(16)            |  | Mn1-O2                | 2.1093(7)  |
| Mn1-N1     | 2.2778(19)            |  | Mn1-N1                | 2.2506(7)  |
| Mn1-N2     | 2.2771(18)            |  | Mn1-N2                | 2.2855(7)  |
| Mn1-N3     | 2.2732(19)            |  | Mn1-N3                | 2.3070(8)  |
| Mn1-N4     | 2.2749(19)            |  | Mn1-N4                | 2.2375(7)  |
| O2-Mn1-N3  | 162.55(6)             |  | O1-Mn1-N3             | 159.77(2)  |
| O1-Mn1-N2  | 157.13(6)             |  | O2-Mn1-N2             | 169.74(3)  |
| N4-Mn1-N1  | 168.75(6)             |  | N4-Mn1-N1             | 165.99(3)  |
|            | <b>3 (4-MeO, bpy)</b> |  | <b>5 (4-Bu, phen)</b> |            |
| Mn1...Mn1' | 4.542(2)              |  | Mn1...Mn1'            | 4.604(2)   |
| Mn1-O1     | 2.130(3)              |  | Mn1-O1                | 2.091(3)   |
| Mn1-O2     | 2.127(3)              |  | Mn1-O2'               | 2.140(4)   |
| Mn1-N1     | 2.258(3)              |  | Mn1-N1                | 2.292(3)   |
| Mn1-N2     | 2.296(3)              |  | Mn1-N2                | 2.295(3)   |
| Mn1-N3     | 2.299(4)              |  | Mn1-N3                | 2.359(5)   |
| Mn1-N4     | 2.261(3)              |  | Mn1-N4                | 2.287(3)   |
| O1-Mn1-N3  | 161.42(11)            |  | O1-Mn1-N2             | 164.63(13) |
| O2-Mn1-N2  | 162.60(11)            |  | O2'-Mn1-N3            | 159.86(11) |
| N1-Mn1-N4  | 165.77(14)            |  | N1-Mn1-N4             | 155.09(13) |

Symmetry codes: for **1**, ('): 1-x,-y,-z; for **2**, (') 1-x,2-y,-z; for **3**, (') 1-x,-y,1-z, for **5**; (') 1-x;1-y,2-z.

**Table S5.** Selected interatomic distances (Å) and angles (deg) with standard deviations in parentheses for compounds **6** and **7**.

|             | <b>6 (3-MeO, phen)</b> |  | <b>7 (4-MeO, phen)</b> |            |
|-------------|------------------------|--|------------------------|------------|
| Mn1...Mn1'  | 3.4596(7)              |  | Mn1...Mn1a             | 3.4442     |
| Mn1-O1      | 2.1616(15)             |  | Mn1-O1                 | 2.1825(18) |
| Mn1-O1'     | 2.1930(14)             |  | Mn1-O1b                | 2.1825(18) |
| Mn1-N1      | 2.2606(16)             |  | Mn1-N1                 | 2.260(3)   |
| Mn1-N2      | 2.2546(18)             |  | Mn1-N2                 | 2.267(3)   |
| Mn1-N3      | 2.2592(16)             |  | Mn1-N1b                | 2.260(3)   |
| Mn1-N4      | 2.2579(16)             |  | Mn1-N2b                | 2.267(3)   |
| O1-Mn1-N2   | 157.74(5)              |  | N1b-Mn1-N1             | 161.08(9)  |
| O1'-Mn1-N3  | 161.61(6)              |  | O1-Mn1-N2              | 159.26(9)  |
| N4-Mn1-N1   | 158.61(6)              |  | O1b-Mn1-N2b            | 159.26(9)  |
| Mn1-O1-Mn1' | 105.21(5)              |  | Mn1-O1b-Mn1a           | 104.19(12) |

Symmetry codes: for **6**, ('): -x+1,-y,-z+1; for **7**, (a) x,-y,z, (b) -x,y,-z

**Table S6.** Selected interatomic distances (Å) and angles (deg) with standard deviations in parentheses for the mononuclear compound **8** and for one of the subunits of compound **9**.

|           | <b>8 (3-MeO, phen)</b> |           | <b>9 (2-MeO, phen)</b> |
|-----------|------------------------|-----------|------------------------|
| Mn1–O1    | 2.134(2)               | Mn1–O1    | 2.154(4)               |
| Mn1–O4    | 2.173(3)               | Mn1–O3    | 2.156(4)               |
| Mn1–N1    | 2.257(3)               | Mn1–O5    | 2.164(3)               |
| Mn1–N2    | 2.270(3)               | Mn1–O6    | 2.179(3)               |
| Mn1–N3    | 2.271(3)               | Mn1–N2    | 2.266(4)               |
| Mn1–N4    | 2.263(3)               | Mn1–N1    | 2.285(4)               |
| N1–Mn1–N4 | 161.70(10)             | O1–Mn1–O3 | 174.77(13)             |
| O1–Mn1–N2 | 163.31(9)              | O6–Mn1–N1 | 172.81(14)             |
| O4–Mn1–N3 | 160.02(9)              | O5–Mn1–N2 | 166.01(13)             |

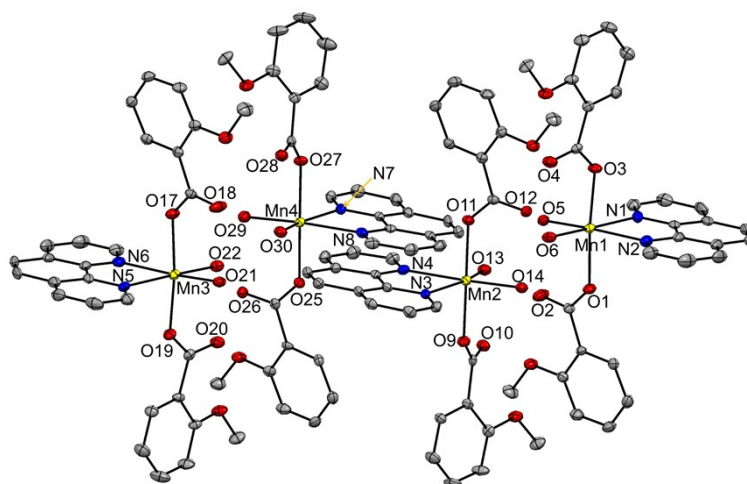

**Figure S3.** Crystal structure for compound **9**, showing the anisotropic displacements as ellipsoids at 50% probability. Hydrogen atoms are omitted for clarity.

**Table S7.** Selected interatomic distances (Å) and angles (deg) with standard deviations in parentheses for the mononuclear compound **9**.

|            |            |             |            |
|------------|------------|-------------|------------|
| Mn1–O1     | 2.154(4)   | Mn3–O19     | 2.149(4)   |
| Mn1–O3     | 2.156(4)   | Mn3–O21     | 2.161(3)   |
| Mn1–O5     | 2.164(3)   | Mn3–O17     | 2.163(4)   |
| Mn1–O6     | 2.179(3)   | Mn3–O22     | 2.182(3)   |
| Mn1–N2     | 2.266(4)   | Mn3–N6      | 2.268(4)   |
| Mn1–N1     | 2.285(4)   | Mn3–N5      | 2.291(4)   |
| O1–Mn1–O3  | 174.77(13) | O19–Mn3–O17 | 173.71(12) |
| O6–Mn1–N1  | 172.81(14) | O21–Mn3–N6  | 166.46(13) |
| O5–Mn1–N2  | 166.01(13) | O22–Mn3–N5  | 172.24(13) |
| Mn2–O9     | 2.150(4)   | Mn4–O27     | 2.152(4)   |
| Mn2–O11    | 2.159(4)   | Mn4–O25     | 2.165(3)   |
| Mn2–O13    | 2.183(3)   | Mn4–O30     | 2.175(3)   |
| Mn2–O14    | 2.183(3)   | Mn4–O29     | 2.184(3)   |
| Mn2–N3     | 2.293(4)   | Mn4–N7      | 2.284(4)   |
| Mn2–N4     | 2.303(3)   | Mn4–N8      | 2.311(3)   |
| O9–Mn2–O11 | 176.49(10) | O27–Mn4–O25 | 175.40(13) |
| O13–Mn2–N3 | 158.76(12) | O30–Mn4–N7  | 158.68(12) |
| O14–Mn2–N4 | 169.95(13) | O29–Mn4–N8  | 170.22(13) |

**Table S8.** Selected interatomic distances (Å) and angles (deg) with standard deviations in parentheses for compound **12**.

|           |          |            |            |
|-----------|----------|------------|------------|
| Mn1··Mn2  | 3.595    | O1–Mn1–N2  | 160.68(14) |
| Mn1··Mn1a | 7.190(5) | O3–Mn1–N1  | 162.58(15) |
| Mn1–O1    | 2.253(4) | O5–Mn1–O2  | 160.30(15) |
| Mn1–O2    | 2.327(3) | O6a–Mn2–O6 | 180.00     |
| Mn1–O3    | 2.102(4) | O4–Mn2–O4a | 180.00     |
| Mn1–O5    | 2.095(4) | O1–Mn2–O1a | 180.00     |
| Mn1–N1    | 2.294(4) |            |            |
| Mn1–N2    | 2.256(4) | Mn2–O1–Mn1 | 105.90(12) |
| Mn2–O1    | 2.251(4) |            |            |
| Mn2–O4    | 2.200(4) |            |            |
| Mn2–O6    | 2.145(4) |            |            |

Symmetry codes: (a) -x+1,-y+1,-z

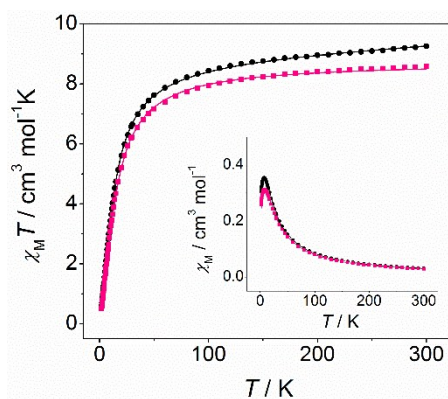

**Figure S4.**  $\chi_M T$  versus  $T$  plots and  $\chi_M$  versus  $T$  (inset) for compounds **4** (black circles) and **5** (pink squares).

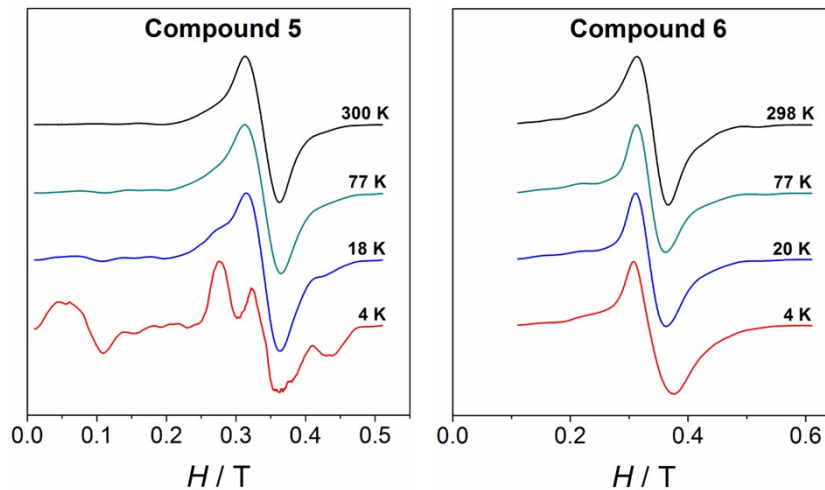

**Figure S5.** Variable-temperature X-band EPR spectra for the antiferromagnetic dinuclear compound **5** and the ferromagnetic dinuclear compound **6**.

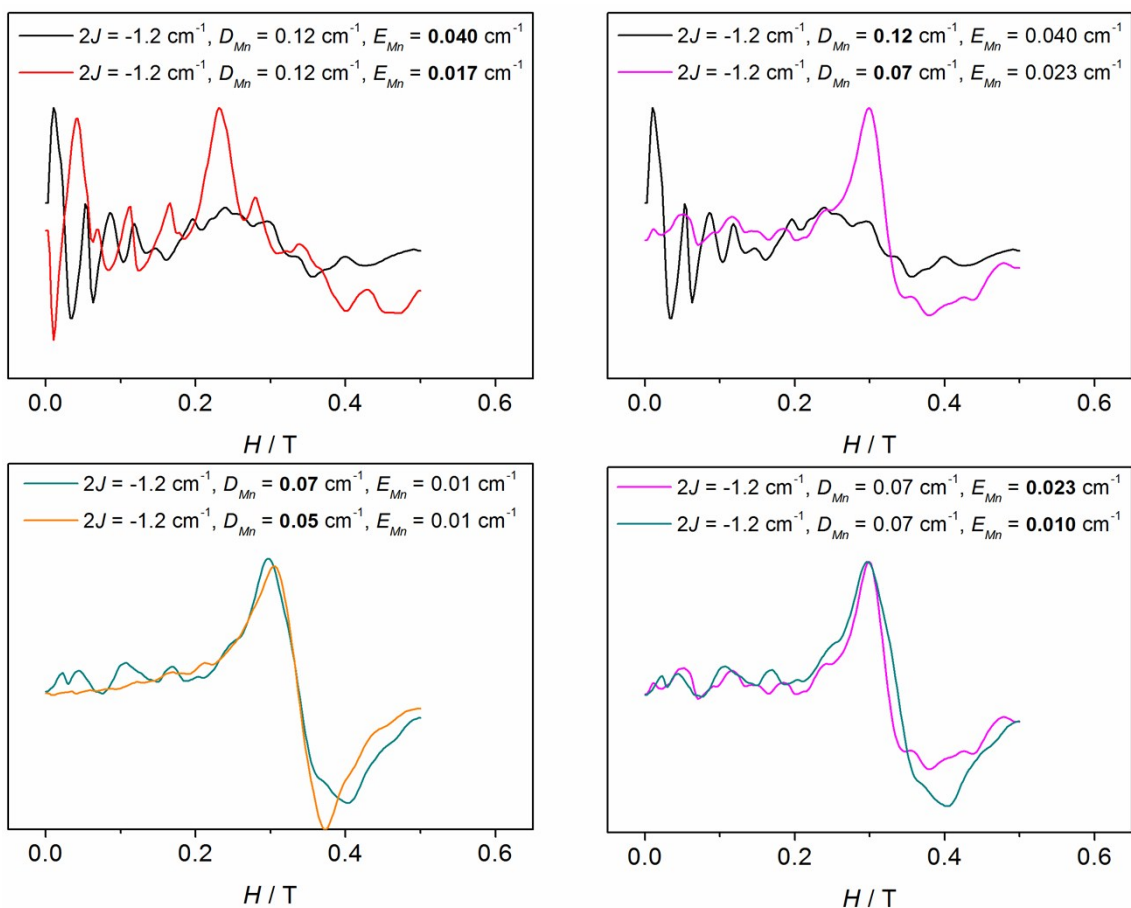

**Figure S6.** Simulated X-band EPR spectra at 4 K for ferromagnetic dinuclear systems with different  $D_{Mn}$  and  $E_{Mn}$  values.

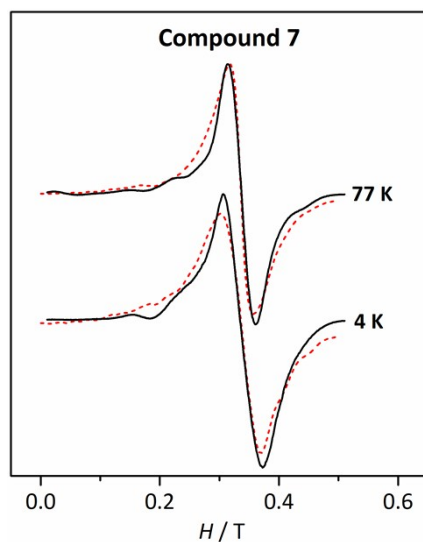

**Figure S7.** X-band EPR spectra for the ferromagnetic dinuclear compound **7** at 4 and 77 K. The dashed lines correspond to the simulations performed with  $2J = -1.3 \text{ cm}^{-1}$ ,  $|D_{Mn}| = 0.05 \text{ cm}^{-1}$  and  $|E_{Mn}| = 0.009 \text{ cm}^{-1}$ .

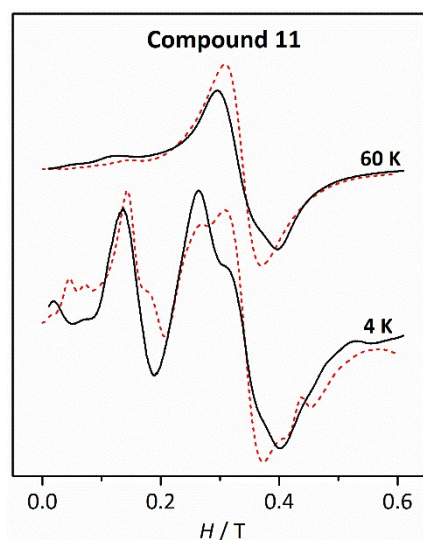

**Figure S8.** X-band EPR spectra for the trinuclear compound **11** at 4 and 60 K. The dashed lines correspond to the simulations performed with  $2J = -2.1 \text{ cm}^{-1}$ ,  $|D_{Mn}| = 0.09 \text{ cm}^{-1}$  and  $|E_{Mn}| = 0.025 \text{ cm}^{-1}$ .

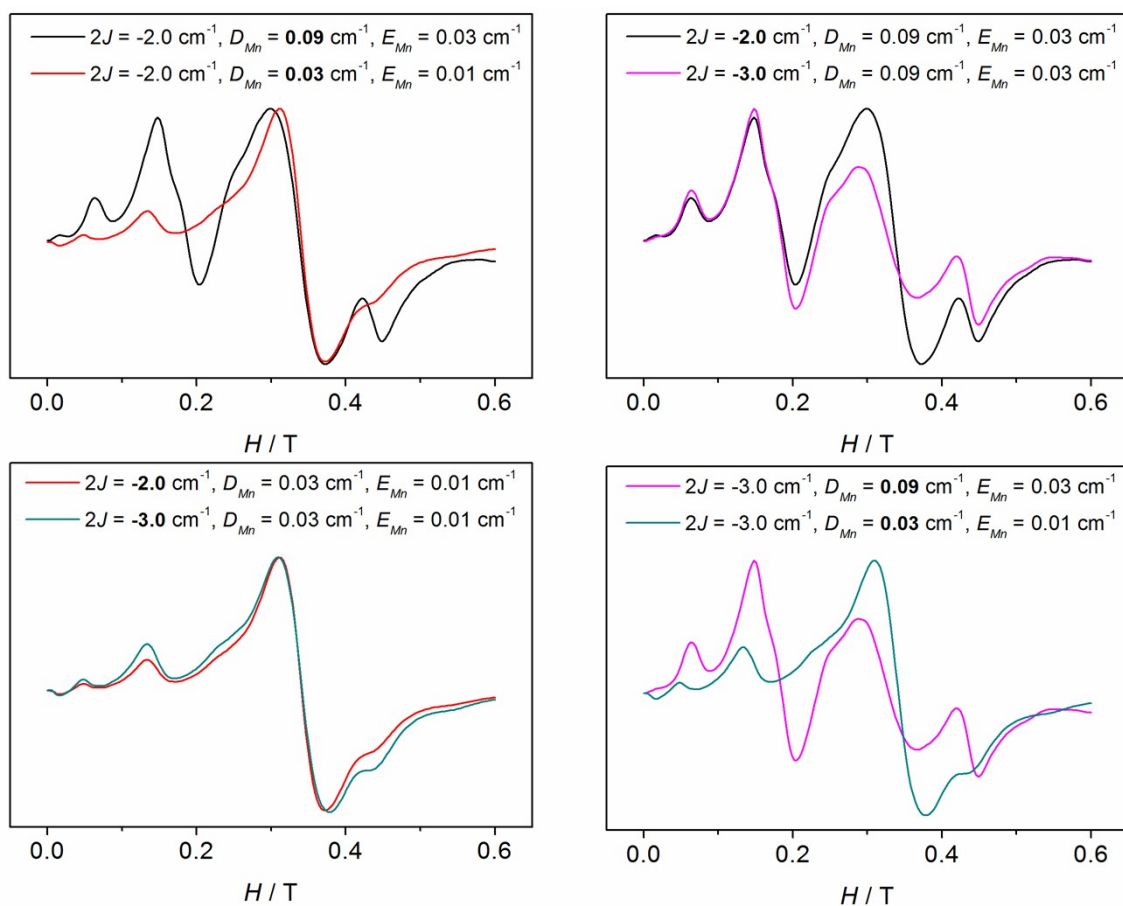

**Figure S9.** Simulated X-band EPR spectra at 4 K for trinuclear systems with different  $2J$ ,  $D_{Mn}$  and  $E_{Mn}$  values.



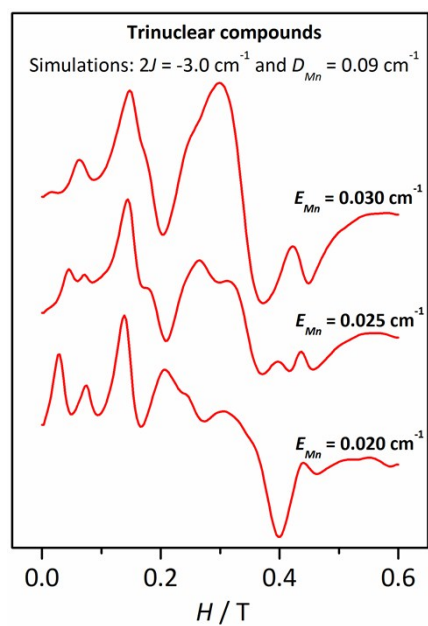

**Figure S10.** Simulated X-band EPR spectra at 4 K for a trinuclear system with  $2J = -3.0 \text{ cm}^{-1}$ ,  $|D_{Mn}| = 0.09 \text{ cm}^{-1}$ , and  $|E_{Mn}| = 0.020, 0.025, \text{ and } 0.030 \text{ cm}^{-1}$ .
